# **The role of glycaemic and lipid risk factors in mediating the effect of BMI on coronary heart disease: A two-step, two-sample Mendelian randomization study**

Lin Xu,<sup>1,2,5</sup> Maria Carolina Borges,<sup>2,3</sup> Gibran Hemani,<sup>2,4</sup> Debbie A Lawlor.<sup>2,4</sup>

<sup>1</sup> School of Public Health, Sun Yat-sen University, Guangzhou 510080, Guangdong, China

<sup>2</sup> MRC Integrative Epidemiology Unit at the University of Bristol, Bristol, UK

<sup>3</sup> Post-Graduate Program in Epidemiology, Federal University of Pelotas, Pelotas, Brazil

<sup>4</sup> School of Social and Community Medicine, University of Bristol, Bristol, UK

<sup>5</sup> School of Public Health, University of Hong Kong, Hong Kong, China

**Corresponding author:** Prof. DA Lawlor

MRC Integrated Epidemiology Unit at the University of Bristol

Address: Rm OS11, Oakfield House, Oakfield Grove, Bristol, BS8 2BN

Telephone: +44 (0)1173310096;

Fax: +44 (0)1179287325

Email: [d.a.lawlor@bristol.ac.uk](mailto:d.a.lawlor@bristol.ac.uk)

Word count: 3,233

## **Funding**

The research leading to these results has received funding from the European Research Council under the European Union's Seventh Framework Programme (FP/2007-2013) / ERC Grant Agreement (Grant number 669545; DevelopObese) and from the European Union's Horizon 2020 research and innovation programme under grant agreement No 733206 (LifeCycle). LX receives financial support from University of Hong Kong/China Medical Board (CMB 2015/16 First Round). MCB received financial support from Conselho Nacional de Desenvolvimento Científico e Tecnológico (CNPq) (fellowship number 144749/2014-9, 201498/2014-6 (Science Without Borders Program)) and Coordenação de Aperfeiçoamento de Pessoal de Nível Superior (CAPES) (fellowship number 201498/2014-6). GH, MCB and DAL works in a Unit that receives funding from the UK Medical Research Council (MC\_UU\_12013/5) and DAL is a UK National Institute of Health Research Senior Investigator (NF-SI-0611-10196). The funders had no role in study design, data collection and analysis, decision to publish, or preparation of the manuscript. The work is of the authors and the views expressed here may not be the views of any funding bodies.

## **Acknowledgements**

Data on body mass index have been contributed by Genetic Investigation of

ANthropometric Traits (GIANT) consortium and have been downloaded from [http://www.broadinstitute.org/collaboration/giant/index.php/GIANT\\_consortium\\_data\\_files](http://www.broadinstitute.org/collaboration/giant/index.php/GIANT_consortium_data_files). Data on coronary artery disease/myocardial infarction have been contributed by CARDIOGRAMplusC4D investigators and have been downloaded from [www.CARDIOGRAMPLUSC4D.ORG](http://www.CARDIOGRAMPLUSC4D.ORG). Data on lipid traits have been contributed by Global Lipids Genetics Consortium and have been downloaded from <http://csg.sph.umich.edu/abecasis/public/lipids2013/>. Data on glycaemic traits have been contributed by MAGIC investigators and have been downloaded from [www.magicinvestigators.org](http://www.magicinvestigators.org). All of these data are publicly available. Investigators who have made their genome-wide data available to scientist may not necessarily agree with comments made in this paper and the authors take full responsibility for the contents of this paper.

# **Disclosures**

DAL has received support from Roche Diagnostic, Ferring Pharmaceuticals and Medtronic in relation to some of her biomarker research that is not related to the research presented here. Other authors declare that they have no conflicts of interest (LX, MCB, GH).

## **Abstract**

### **Background**

The extent to which effects of BMI on coronary heart disease (CHD) are mediated by glycaemic and lipid risk factors is unclear.

### **Methods**

We used two-sample Mendelian randomization to determine the causal effect of: (i) BMI on CHD (60,801 cases; 123,504 controls), type 2 diabetes (T2DM; 34,840 cases; 114,981 controls), fasting glucose (n=46,186), insulin (n=38,238), HbA<sub>1c</sub> (n=46,368), LDL-cholesterol (LDL-C), HDL-cholesterol (HDL-C) and triglycerides (n=188,577); (ii) glycaemic and lipid traits on CHD; and (iii) extent to which these traits mediated any effect of BMI on CHD.

### **Findings**

One standard deviation (SD) increase in BMI ( $\sim 4.5\text{kg/m}^2$ ) increased CHD (odds ratio=1.45 (95% confidence interval (CI): 1.27, 1.66)) and T2DM (1.96 (1.35, 2.83)), and levels of fasting glucose (0.07mmol/l (95%CI 0.03, 0.11)), HbA<sub>1c</sub> (0.05% (95%CI 0.01, 0.08)), fasting insulin (0.18log pmol/l (95%CI 0.14, 0.22)) and triglycerides (0.20 SD (95%CI 0.14, 0.26)), and lowered levels of HDL-C (-0.23 SD (95%CI -0.32, -0.15)). BMI was not causally related to LDL-C. After accounting for potential pleiotropy, triglycerides, HbA<sub>1c</sub> and T2DM were causally related to CHD. The BMI-CHD effect reduced from 1.45 to 1.16 (95%CI 0.99, 1.36) and to 1.36 (95%CI 1.19, 1.57) with genetic adjustment for triglycerides or HbA<sub>1c</sub> respectively, and to 1.09 (95%CI 0.94, 1.27) with adjustment for both.

### **Interpretation**

Increased triglyceride levels and poor glycaemic control appear to mediate much of the effect of BMI on CHD.

### **Funding**

European Research Council (669545), European Union (733206), China Medical Board (CMB\_2015/16), Conselho Nacional de Desenvolvimento Científico e Tecnológico and UK Medical Research Council (MC\_UU\_12013/5).

**(word count: 250)**

**Keywords:** Body mass index, coronary heart disease, Mendelian randomization, cardiovascular disease risk factors, mediation

## Research in context

### Evidence before this study

We searched PubMed (<https://www.ncbi.nlm.nih.gov/pubmed>) using various combinations of the following search terms: (“body mass index” or “BMI” or “adiposity” or “weight”) and (“coronary heart disease” or “CHD” or “myocardial infarction” or “MI” or “cardiovascular disease” or “CVD”) and (“diabetes” or “glucose” or “glycaeted haemoglobin” or “HbA1c” or “insulin” or “insulin resistance” or “insulin sensitivity”) and (“lipid” or “dyslipidaemia” or “low density lipoprotein cholesterol” or “LDL-C” or “high density lipoprotein cholesterol” or “HDL-C” or “triglyceride” or “cholesterol”) and (“Mendelian” or “Mendelian randomization” or “Mendelian randomisation”) and (“two-step” or “mediation”). We used these searches to identify any published paper (published in English) that was a Mendelian randomization study testing the effect of BMI on CHD. We ran the searches so that they would include any such study that tested mediation (by any factors) of the effect of BMI on CHD, but was not exclusive for mediation studies. We identified four publications, from three studies that fulfilled our criteria. These were all one-sample (both effect of genetic instrumental variable on BMI and of genetic instrumental variable on CHD from the same study sample(s)) and all in predominantly European origin participants. The number of CHD cases in these studies were between 3062 and 11056. Whilst one of these studies reported a null effect of BMI on CHD based on a p-value threshold of 0.05, when we meta-analysed the results there was evidence of a positive effect of BMI from these three studies: Odds ratio of CHD per 4.5kg/m<sup>2</sup> 1.34 (95%CI: 1.03, 1.74), I<sup>2</sup> 47%. We identified only one study that used Mendelian randomization to test the effect of BMI on CHD and then explored possible mediators, despite finding no evidence of an effect of BMI on LDL-C they concluded that it explained 8% of the effect of BMI on CHD, and further that remnant cholesterol (triglyceride) explained 7% and systolic blood pressure explained 8%. That study was unable to explore the potential mediating effect of insulin resistance or glycaemic risk factors on the effect of BMI on CHD. This is important as BMI is strongly related to insulin resistance/hyperglycaemia, which in turn is a strong risk factor for CHD.

### Added value of this study

We used 77 independent single nucleotide polymorphisms (SNPs) identified as robustly associated with BMI from genome-wide association studies, as genetic instrumental variables to test the causal effect of BMI on CHD and the extent to which this was mediated by lipid or insulin/glycaemic traits. In comparison with existing evidence, we used 2-sample Mendelian randomisation, were able to explore mediation by insulin/glycaemic traits and explore whether we could replicate the lipid mediating effects from the one previous study to assess this and had considerably larger sample sizes (e.g. 60,801 CHD cases). Importantly, we were able to apply a number of sensitivity analyses using novel methods for testing possible bias due to pleiotropy (the likely key source of bias in Mendelian randomization studies) that have been developed for use in 2-sample Mendelian randomization. We found evidence for a positive effect of BMI on CHD, type 2 diabetes, fasting glucose,

HbA<sub>1c</sub>, fasting insulin and triglycerides, and an inverse effect on HDL-C; we did not find robust evidence for an effect of BMI on LDL-C. After accounting for potential pleiotropy, we also found that triglycerides, HbA<sub>1c</sub> and T2DM were causally related to CHD, and that these mediated most of the effect of BMI on CHD. .

### **Implications of all the available evidence**

Whilst preventing overweight and obesity is an important public health aim, the substantial and increasing number of people with a high body mass index highlights the need for secondary prevention that aims to reduce risk of the main disease outcomes of high BMI (e.g. CHD) in those with high BMI, by targeting causal mediators. Treating causal mediators of the effect of BMI on CHD could mitigate its effect, but biases in conventional epidemiological methods for testing mediation have limited our understanding of which CHD risk factors mediate BMI effects. Our findings provide strong support for undertaking RCTs in obese people to test the effect of triglyceride reduction and glycaemic control as a method for reducing CHD risk in these people.

# Introduction

Greater body mass index (BMI) is a risk factor for a wide range of adverse health outcomes, including coronary heart disease (CHD), the leading cause of death worldwide. Whilst preventing overweight and obesity is an important public health aim, the substantial and increasing number of people with a high body mass index highlights the need for secondary prevention that aims to reduce risk of the main disease outcomes of high BMI, such as CHD, in those with high BMI, by targeting causal mediators. This is also important because, beyond bariatric surgery<sup>1</sup> there are no effective and sustainable treatments for those who are obese.

Large prospective population studies show that higher BMI is associated with adverse blood lipid levels, higher fasting glucose, insulin, type 2 diabetes mellitus (T2DM), and CHD. Randomized controlled trials (RCTs) show that elevated triglycerides, low-density lipoprotein cholesterol (LDL-C), glucose and blood pressure increase the risk of CHD.<sup>2,3</sup> Thus, the association of BMI with CHD could be mediated by these established modifiable risk factors. However, the common method used to test for mediation by observing how much the confounder adjusted multivariable association between a risk factor (e.g. BMI) and outcome (e.g. CHD) reduces with further adjustment for potential mediators,<sup>4</sup> has been shown to be biased in many situations.<sup>5</sup>

Mendelian randomization (MR), the use of genetic variants as instrumental variables

to test the causal effect of risk factors on outcomes, is unlikely to be biased by the extensive confounders of multivariable observational analyses, is less prone to measurement error, and because genetic variants are fixed at conception cannot be biased by reverse causality.<sup>6,7</sup> As such, it has been used increasingly over the past decade to provide more robust estimates for the causal effect of many risk factors on a range of health outcomes, with results from MR closely resembling those from RCTs where both are available (e.g. the effect of LDL-C<sup>8</sup> and systolic blood pressure<sup>9</sup> on CHD). More recent methods have been developed for its use in testing causal mediation using a two-step approach that are considerably less prone to the biases inherent in the common multivariable approach.<sup>5</sup> **Box 1** provides a brief description of MR and its assumptions.

Previous MR studies using data from three collections have shown that higher BMI increases risk for CHD (**Supplementary Figure 1** shows results of our meta-analysis of these previous MR studies).<sup>10-13</sup> These studies used one-sample MR and were unable to undertake sensitivity analyses that have recently been developed for testing likely bias by pleiotropy (**Box 1**).<sup>14</sup> The number of cases of CHD varied from 3062 to 11056, which is modest for MR studies. Although MR is likely to be less biased than conventional multivariable approaches, it usually requires a large sample size. Only one of these MR studies analysed potential mediators of the impact of BMI on CHD. It concluded that LDL-C, remnant cholesterol and systolic blood pressure, explained 8%, 7% and 7%, respectively, of the effect of BMI on



CHD.<sup>13</sup> That study was unable to explore potential mediation by insulin sensitivity or hyperglycaemia, which are strongly influenced by BMI and are strong risk factors for CHD. Here, we aimed to investigate the mediating effect of lipid and insulin/glycaemic traits of the effect of BMI on CHD using a large MR study, including over 60,000 CHD, and to analyse a wider set of potential mediators including glycaemic traits (fasting glucose and insulin, Hb<sub>A1c</sub>, T2DM) than previous studies.

## Methods

We used two-step two-sample MR<sup>5,15</sup> with publicly available datasets that provide genome-wide association results for BMI, glycaemic traits, lipids and CHD.

Two-sample MR refers to the use of different datasets (samples) to obtain the gene-risk factor (e.g. BMI) and gene-outcome (e.g. CHD) associations. We firstly tested the effects of BMI on CHD, and then the effects of potential mediation using two-step MR. In step-one we tested causal effects of BMI on potential mediators and in step-two the causal effects of potential mediators on CHD.<sup>5</sup>

### *Data sources*

#### *(a) Genetic instrumental variable for BMI*

From the most updated genome wide associations studies (GWAS) on BMI, we obtained 77 single nucleotide polymorphisms (SNPs), identified from the primary meta-analysis of 322,154 European-descent individuals, independently contributing

to BMI at genome wide significance ( $p < 5 \times 10^{-8}$ ).<sup>16</sup> These variants were defined as being independent of each other on the basis of low correlation ( $R^2 < 0.1$ ) in HapMap22 or the 1000 genome project data. These 77 SNPs account for 2.4% of BMI phenotypic variance.<sup>16</sup> As a sensitivity analysis we further included 20 SNPs from the secondary analysis of this GWAS;<sup>16</sup> these include some SNPs that did not reach genome wide significance in Europeans.

*(b) Potential mediators:*

Association of SNPs with the phenotypes were extracted from publicly available GWAS consortia. Data on type 2 diabetes mellitus (T2DM) GWAS correlates was obtained from the DIAbetes Genetics Replication And Meta-analysis (DIAGRAM, <http://diagram-consortium.org/downloads.html>), which includes 34,840 cases and 114,981 controls of European origin.<sup>17</sup> Genetic associations with fasting insulin (n=38,238), fasting glucose (n=46,186) and glycosylated haemoglobin A<sub>1c</sub> (HbA<sub>1c</sub>) (n=46,368) were obtained from the Meta-Analyses of Glucose and Insulin-related traits Consortium (MAGIC) and were downloaded from <http://www.magicinvestigators.org/>; participants were of European ancestry without diabetes.<sup>18</sup> Genetic associations with high density lipoprotein cholesterol (HDL-C), LDL-C and triglycerides in 188,577 Europeans were obtained from the Global Lipids Genetics Consortium (GLGC) investigators and were downloaded from <http://csg.sph.umich.edu/abecasis/public/lipids2013/>.<sup>19</sup>

*(c) Study outcome: coronary heart disease*

Data on coronary artery disease/myocardial infarction were obtained from the Coronary ARtery DIsease Genome wide Replication and Meta-analysis (CARDIoGRAM) plusC4D investigators and have been downloaded from [www.CARDIOGRAMPLUSC4D.ORG](http://www.CARDIOGRAMPLUSC4D.ORG).<sup>20</sup> This includes 60,801 CHD cases and 123,504 controls. We first searched the CARDIoGRAMplusC4D 1000 Genomes-based GWAS, a meta-analysis of GWAS studies of mainly European, South Asian, and East Asian, descent imputed using the 1000 Genomes phase 1 v3 training set with 38 million variants.<sup>21</sup> If no summary data on the gene-CHD association were found from the 1000 Genomes, we screened in CARDIoGRAMplusC4D MetaboChip next. If the targeted SNPs were not found in either the 1000 Genomes and the CARDIoGRAMplusC4D MetaboChip, we then screened CARDIoGRAM GWAS. The genetic variants used as instrumental variables for CHD, BMI and CHD risk factors (potential mediators) are all shown in **Supplementary Tables 1 to 9**.

### *Statistical analysis*

As an indication of the strength of the association between genetic instruments and phenotypes, we report the proportion of variation in BMI and all mediators explained by their genetic variant instruments and also the F-statistic for the regression of BMI and all mediators on their genetic instruments.

The proportion of the BMI-CHD effect that is explained by a group of mediators will be estimated with bias if the mediators are related to each other and also if the

outcome has an effect on the mediator (i.e. there is reverse causality). Therefore, we tested for potential bi-directional causal effects of BMI, potential mediators and CHD with each other using the inverse variance weighted (IVW) approach described below.

To provide comprehensive assessment using two-sample instrumental variable analysis, five different analytical approaches were used for both step-one (effect of BMI on CHD and potential mediators) and step-two (effect of potential mediators on CHD) of the two-step MR mediation approach. Each of the five methods are different approaches that can be used in the two-sample MR framework. The value of comparing results from all five is that they have some different underlying assumptions and therefore we have more confidence in results that are consistent across the different methods. Full details of these approaches, including their different assumptions, are provided in the Supplementary Methods.

To estimate the effect of BMI on CHD taking account of genetically determined potential mediators, we used the IVW MR method, adjusting for the SNP-potential mediator effect.<sup>22</sup> The proportion of the effect that is mediated by any of the potential mediators was estimated by the changes in the total effect of the genetically determined BMI on CHD risk (more details in the Supplementary Methods). This method assumes that mediators are continuously measured variables and as T2DM is dichotomized we did not assess the proportion of the BMI-CHD effect due to T2DM.

A detailed analysis diagram was shown in **Figure 1**. All statistical analysis was performed using STATA 13.1 and R-software (Version 3.2.5).

## Results

The proportion of variation explained by all of the variants that we used as instrumental variables for the potential mediators varied from 1.2% (for fasting insulin) to 5.7% (for T2DM) (Supplementary Tables 1-8). The first stage F-statistic for all of the MR analyses (i.e. for the regression of BMI and each of the mediators on their genetic variant instrument variables) were all very large ( $> 500$ ).

### *Relationships between potential mediators and CHD*

As expected, we observed evidence for bidirectional association between FPG and T2DM, and for both FPG and T2DM associate with HbA<sub>1c</sub> (**Table 1**). LDL-C, HDL-C and triglycerides appeared related to each other. CHD appears to be causally positively related to T2DM, but was not related to other potential mediators (**Table 1**).

### *Effects of BMI on CHD and glycaemic and lipid traits*

The IVW MR method showed evidence that BMI was causally related to CHD and all of the glycaemic and lipid traits except LDL-C (**Table 2**). There was consistent support across all five MR methods for a causal effect of greater BMI on increased CHD and T2DM risk and levels of fasting glucose, HbA<sub>1c</sub>, fasting insulin and

triglycerides, together with decreased HDL-C. None of the methods supported a causal effect of BMI on LDL-C (**Table 2 and Supplementary Table 10**).

### *Effects of potential mediators on CHD*

There was broadly consistent support across all five MR methods for a positive effect of T2DM, HbA<sub>1c</sub>, triglycerides and LDL-C on CHD risk (**Table 3**). For T2DM the MR-Egger 95% confidence interval just included the null value, but this method has lower statistical power than the other four methods and the point estimates were similar for all five methods. For triglycerides the estimate of effect (slope) from MR-Egger was a little weaker than for all of the other methods (e.g. 1.24 versus 1.13 comparing the IVW and MR-Egger methods), suggesting that some, but not all, of the effect of triglycerides estimated by IVW and other methods might be due to horizontal pleiotropy. In IVW, and the median methods analyses, lower HDL-C and higher fasting glucose and insulin appeared to be causally related to higher risk of CHD. However, for all of these MR-Egger suggested that effects were largely due to horizontal pleiotropy, with effect estimates markedly attenuated to the null and the intercepts all being non-zero.

### *Mediating effects of lipids and glycaemic traits on BMI-CHD effects*

We explored those potential mediators that had causal MR support for both an effect of BMI on them (step-one) and of the mediators on CHD (step-two): T2DM, HbA<sub>1c</sub> and triglycerides. Our results suggested that triglycerides were an important mediator,

with either T2DM or HbA<sub>1c</sub> further contributing to mediation of BMI on CHD. The BMI-CHD effect reduced from 1.45 (95% confidence interval (CI): 1.27, 1.66) to 1.16 (95% CI: 0.99, 1.36) and to 1.36 (95% CI: 1.19, 1.57) with genetic adjustment for triglycerides or HbA<sub>1c</sub> respectively, and to 1.09 (95% CI: 0.94, 1.27) with adjustment for both (**Table 4 and Supplementary Table 11**).

## Discussion

We used MR analysis to investigate the extent to which glycaemic and/or lipid traits might mediate a causal path between BMI and CHD. Consistent with previous studies,<sup>10-13</sup> but here using a larger number of CHD cases and genetic variants, we show that higher BMI causes greater CHD risk. Our results also suggest that triglycerides, HbA<sub>1c</sub> and T2DM play important roles in causally mediating the effect of BMI on CHD. By contrast our results suggest that BMI is not causally related to LDL-C and that HDL-C, fasting glucose and insulin may not be causally related to CHD. Thus, our findings provide strong support for undertaking RCTs in obese people to test the effect of triglyceride reduction and glycaemic control on CHD risk.

Several MR studies have previously examined the association of BMI with CHD and CHD risk factors.<sup>10,11,13,23,24</sup> Our results are broadly consistent with those, including our finding that BMI does not appear to be causally related to LDL-C.<sup>11,23,25</sup> This is further supported by two RCTs of bariatric surgery which find intensive weight loss does not lower LDL-C.<sup>26,27</sup> Consistent with our results, previous MR studies have

also shown positive causal effects of T2DM, HbA<sub>1c</sub>, LDL-C and triglycerides, with CHD<sup>28,29, 30,31</sup>, but not fasting glucose or HDL-C once horizontal pleiotropy has been accounted for. The discrepancy between finding a causal effect of T2DM and HbA<sub>1c</sub> on CHD, but not of fasting glucose, might suggest that non-fasting (post-prandial) glucose, more so than fasting levels, are most relevant for CHD risk, and/or that long-term hyperglycaemia (as assessed by elevated HbA<sub>1c</sub> and likely to be identified as being above the threshold required to diagnose T2DM) are important.

To our knowledge only one previous study has tried to explore potential mediation of the BMI-CHD effect in an MR framework. That study included 11,056 CHD cases and 75,627 controls from Copenhagen and used only 3 BMI-related SNPs. It concluded that the effect of BMI on increased CHD risk was partly mediated through elevated levels of LDL-C, non-fasting remnant cholesterol and systolic blood pressure.<sup>13</sup> The evidence for a mediating role of remnant cholesterol is entirely consistent with our findings here for triglycerides, as remnant cholesterol is the cholesterol content of triglyceride-rich lipoproteins, particularly so in this previous study where remnant cholesterol was not directly measured but estimated from other lipids using a method that would produce an extremely high correlation between (measured) triglycerides and estimated remnant cholesterol.<sup>13</sup>

None of our study, the previous (Copenhagen) study,<sup>12,13</sup> other MR studies<sup>11,23,25</sup> or RCTs of bariatric surgery<sup>32,33</sup> have found strong evidence for a causal effect of BMI



on LDL-C, which suggests it is unlikely to be an important mediator of BMI on CHD. However, since the previous study (despite finding no MR evidence for a causal effect of BMI on LDL-C) concluded that LDL-C was a partial mediator<sup>13</sup> we examined that possibility in our data. As expected we found no strong support for a mediating effect of LDL-C between BMI and CHD (**Supplementary Table 12**). We were unable to explore any mediating effect of blood pressure in our study. This is because our approach uses publicly available aggregate genome-wide results and the International Consortium for Blood Pressure (ICBP) provides information on SNPs and blood pressure associations without specifying the risk (or effect) allele for each SNP, and thus the effect of BMI on blood pressure cannot be assessed using two-sample MR instrumental variable analysis.

CHD is a major cause of morbidity and mortality and its prevalence is increasing worldwide, partly because of the increasing prevalence of obesity. Our results indicate the extent to which acting on risk factors, such as triglycerides, HbA<sub>1c</sub> and T2DM, might counteract the detrimental effects of obesity on CHD. They highlight the potential importance of using interventions that lower triglycerides and/or HbA<sub>1c</sub> and T2DM specifically in those with obesity.<sup>34,35</sup> There is evidence, including from MR, that statins affect triglycerides and remnant cholesterol, as well as LDL-C.<sup>36</sup> Furthermore, a rare variant in *APOC3* with a marked effect on triglyceride levels provides a potential target for drug development aimed at reducing triglyceride levels, independently of any statin effects.<sup>37,38</sup> Thus, targets for reducing

triglycerides exist and testing the effect of these in obese populations would be feasible. Previous RCTs have shown that the oral hypoglycaemic metformin reduces cardiovascular risk factors<sup>39-41</sup> in non-diabetic at risk populations, including those who are obese, but its effect on CHD risk has yet to be established. Our results suggest that it might be cardio-protective in populations with high BMI and supports RCTs to test its effect on CHD in these people.

### ***Strengths and limitations***

Our study is extremely large and uses genetic variants to avoid some of the key limitations of traditional multivariable regression approaches to mediation. Horizontal pleiotropy is one of the major concerns in relation to limitations of MR studies. However, to explore the potential effects of this pleiotropy, we used different MR methods (IVW, median-based estimators and MR-Egger) that have different assumptions and we assessed the consistency across each of these estimators. The mediators that we took forward into MR-based mediation analyses (triglycerides, HbA<sub>1c</sub> and T2DM) had consistent causal effects across these different methods for both steps – i.e. the effect of BMI on them and of them on CHD. In the mediation analyses, where we include both genetically predicted triglycerides and HbA<sub>1c</sub>, we are assuming that these two (triglycerides and HbA<sub>1c</sub>) are not causally related to each other. We tested for causal relationships between potential mediators prior to our main two-step MR analyses and these suggested that triglycerides are not causally related to HbA<sub>1c</sub> or other glycaemic traits. However, MR studies cannot completely

rule out a causal relationship between the two. Previous large prospective studies showed triglycerides predicted the development of T2DM,<sup>42,43</sup> if this association is casual, the estimated mediation effect by dysglycaemia and triglycerides could be inflated. Our results would be biased if the mediators we have tested caused variation in BMI (i.e. there was reverse causality from mediators to BMI). If this were the case, we would expect a bi-directional MR effect between BMI and the mediating risk factors. However, we found no evidence that triglycerides or HbA<sub>1c</sub> caused variation in BMI (though the causal effect of BMI to these mediators was present).

Whilst all five MR methods suggest a casual effect of triglycerides on CHD, the MR-Egger intercept suggest that there might be some horizontal pleiotropy for this effect. It is plausible that the genetic variants we used as instruments for triglycerides also affect other remnant cholesterol or other lipids and in fact these also contribute to mediating BMI effects on CHD. Another potential limitation to our study is that we have assumed no interaction between BMI and mediators, but we are not able to test for this because we have used aggregated genome-wide data. Previous observational studies suggest that the association between BMI and CHD may be modified by hypertension,<sup>44</sup> but did not find effect modification by the glycaemic and lipid traits that we have examined here.<sup>45</sup> In two sample MR weak instrument bias can result in bias towards the null. In mediation analyses this could result in an underestimation of mediating effects. However, given our large sample size and the

fact that our genetic instruments explained 2.1% and 2.4% of the variation in triglycerides and HbA<sub>1c</sub>, respectively, and had very large first-stage F-statistics, we think this is unlikely to have had a major effect on our results.

In conclusion, our result support a causal effect of higher BMI increasing risk of CHD, that is, at least partially, mediated through effects of BMI on triglycerides, HbA<sub>1c</sub> and T2DM. These findings support the need for interventional studies examining whether lowering triglycerides or providing anti-diabetic therapy in people who are overweight or obese is effective at reducing their increased risk (in comparison to healthy weight people) of CHD.

### **Author contributions**

Study design: DAL, LX, MCB, GH

Analysis plan: LX, DAL, MCB

Data acquisition (from public data): LX, GH

Analyses: LX

Writing first draft of paper: LX

Critical comments and contributions to final writing of paper: DAL, MCB, GH

### **References**

1. Courcoulas AP, Christian NJ, Belle SH, et al. WEight change and health

outcomes at 3 years after bariatric surgery among individuals with severe obesity.

*JAMA* 2013; **310**(22): 2416-25.

2. Cholesterol Treatment Trialists C, Mihaylova B, Emberson J, et al. The effects of lowering LDL cholesterol with statin therapy in people at low risk of vascular disease: meta-analysis of individual data from 27 randomised trials. *Lancet* 2012; **380**(9841): 581-90.
3. Gerstein HC, Miller ME, Ismail-Beigi F, et al. Effects of intensive glycaemic control on ischaemic heart disease: analysis of data from the randomised, controlled ACCORD trial. *Lancet* 2014; **384**(9958): 1936-41.
4. Baron RM, Kenny DA. The moderator-mediator variable distinction in social psychological research: conceptual, strategic, and statistical considerations. *J Pers Soc Psychol* 1986; **51**(6): 1173-82.
5. Richmond RC, Hemani G, Tilling K, Davey Smith G, Relton CL. Challenges and novel approaches for investigating molecular mediation. *Hum Mol Genet* 2016.
6. Smith GD, Lawlor DA, Harbord R, Timpson N, Day I, Ebrahim S. Clustered environments and randomized genes: a fundamental distinction between conventional and genetic epidemiology. *PLoS Med* 2007; **4**(12): e352.
7. Lawlor DA, Harbord RM, Sterne JA, Timpson N, Davey Smith G. Mendelian randomization: using genes as instruments for making causal inferences in epidemiology. *Stat Med* 2008; **27**(8): 1133-63.
8. Ference BA, Majeed F, Penumetcha R, Flack JM, Brook RD. Effect of naturally random allocation to lower low-density lipoprotein cholesterol on the risk of

coronary heart disease mediated by polymorphisms in NPC1L1, HMGCR, or both: a 2 x 2 factorial Mendelian randomization study. *J Am Coll Cardiol* 2015; **65**(15): 1552-61.

9. Ference BA, Julius S, Mahajan N, Levy PD, Williams KA, Sr., Flack JM.

Clinical effect of naturally random allocation to lower systolic blood pressure

beginning before the development of hypertension. *Hypertension* 2014; **63**(6):

1182-8.

10. Hagg S, Fall T, Ploner A, et al. Adiposity as a cause of cardiovascular disease: a

Mendelian randomization study. *Int J Epidemiol* 2015; **44**(2): 578-86.

11. Holmes MV, Lange LA, Palmer T, et al. Causal effects of body mass index on

cardiometabolic traits and events: a Mendelian randomization analysis. *Am J Hum*

*Genet* 2014; **94**(2): 198-208.

12. Nordestgaard BG, Palmer TM, Benn M, et al. The Effect of Elevated Body Mass

Index on Ischemic Heart Disease Risk: Causal Estimates from a Mendelian

Randomisation Approach. *PLoS Med* 2012; **9**(5): e1001212.

13. Varbo A, Benn M, Smith GD, Timpson NJ, Tybjaerg-Hansen A, Nordestgaard

BG. Remnant cholesterol, low-density lipoprotein cholesterol, and blood pressure as

mediators from obesity to ischemic heart disease. *Circ Res* 2015; **116**(4): 665-73.

14. Bowden J, Davey Smith G, Burgess S. Mendelian randomization with invalid

instruments: effect estimation and bias detection through Egger regression. *Int J*

*Epidemiol* 2015; **44**(2): 512-25.

15. Lawlor DA. Commentary: Two-sample Mendelian randomization: opportunities

and challenges. *Int J Epidemiol* 2016; **45**(3): 908-15.

16. Locke AE, Kahali B, Berndt SI, et al. Genetic studies of body mass index yield new insights for obesity biology. *Nature* 2015; **518**(7538): 197-206.

17. Morris AP, Voight BF, Teslovich TM, et al. Large-scale association analysis provides insights into the genetic architecture and pathophysiology of type 2 diabetes. *Nat Genet* 2012; **44**(9): 981-90.

18. Dupuis J, Langenberg C, Prokopenko I, et al. New genetic loci implicated in fasting glucose homeostasis and their impact on type 2 diabetes risk. *Nature genetics* 2010; **42**(2): 105-16.

19. Global Lipids Genetics C, Willer CJ, Schmidt EM, et al. Discovery and refinement of loci associated with lipid levels. *Nat Genet* 2013; **45**(11): 1274-83.

20. Schunkert H, König IR, Kathiresan S, et al. Large-scale association analysis identifies 13 new susceptibility loci for coronary artery disease. *Nature genetics* 2011; **43**(4): 333-8.

21. Nikpay M, Goel A, Won HH, et al. A comprehensive 1,000 Genomes-based genome-wide association meta-analysis of coronary artery disease. *Nat Genet* 2015; **47**(10): 1121-30.

22. Burgess S, Dudbridge F, Thompson SG. Re: “Multivariable Mendelian Randomization: The Use of Pleiotropic Genetic Variants to Estimate Causal Effects”. *American Journal of Epidemiology* 2015; **181**(4): 290-1.

23. Fall T, Hagg S, Magi R, et al. The role of adiposity in cardiometabolic traits: a Mendelian randomization analysis. *PLoS Med* 2013; **10**(6): e1001474.

24. Millard LA, Davies NM, Timpson NJ, Tilling K, Flach PA, Davey Smith G.  
MR-PheWAS: hypothesis prioritization among potential causal effects of body mass index on many outcomes, using Mendelian randomization. *Sci Rep* 2015; **5**: 16645.
25. Fall T, Hagg S, Ploner A, et al. Age- and sex-specific causal effects of adiposity on cardiovascular risk factors. *Diabetes* 2015; **64**(5): 1841-52.
26. Martins C, Strommen M, Stavne OA, Nossum R, Marvik R, Kulseng B.  
Bariatric surgery versus lifestyle interventions for morbid obesity--changes in body weight, risk factors and comorbidities at 1 year. *Obes Surg* 2011; **21**(7): 841-9.
27. Herrera MF, Pantoja JP, Velazquez-Fernandez D, et al. Potential additional effect of omentectomy on metabolic syndrome, acute-phase reactants, and inflammatory mediators in grade III obese patients undergoing laparoscopic Roux-en-Y gastric bypass: a randomized trial. *Diabetes care* 2010; **33**(7): 1413-8.
28. Ahmad OS, Morris JA, Mujammami M, et al. A Mendelian randomization study of the effect of type-2 diabetes on coronary heart disease. *Nat Commun* 2015; **6**: 7060.
29. Ross S, Gerstein HC, Eikelboom J, Anand SS, Yusuf S, Pare G. Mendelian randomization analysis supports the causal role of dysglycaemia and diabetes in the risk of coronary artery disease. *Eur Heart J* 2015; **36**(23): 1454-62.
30. Holmes MV, Asselbergs FW, Palmer TM, et al. Mendelian randomization of blood lipids for coronary heart disease. *Eur Heart J* 2015; **36**(9): 539-50.
31. Jansen H, Samani NJ, Schunkert H. Mendelian randomization studies in coronary artery disease. *Eur Heart J* 2014; **35**(29): 1917-24.



32. Mensinger JL, Calogero RM, Stranges S, Tylka TL. A weight-neutral versus weight-loss approach for health promotion in women with high BMI: A randomized-controlled trial. *Appetite* 2016; **105**: 364-74.
33. The Look AHEAD Research Group. Cardiovascular Effects of Intensive Lifestyle Intervention in Type 2 Diabetes. *New England Journal of Medicine* 2013; **369**(2): 145-54.
34. Miller M, Stone NJ, Ballantyne C, et al. Triglycerides and cardiovascular disease: a scientific statement from the American Heart Association. *Circulation* 2011; **123**(20): 2292-333.
35. Perk J, De Backer G, Gohlke H, et al. European Guidelines on cardiovascular disease prevention in clinical practice (version 2012). *The Fifth Joint Task Force of the European Society of Cardiology and Other Societies on Cardiovascular Disease Prevention in Clinical Practice (constituted by representatives of nine societies and by invited experts)* Developed with the special contribution of the European Association for Cardiovascular Prevention & Rehabilitation (EACPR) 2012; **33**(13): 1635-701.
36. Wurtz P, Wang Q, Soininen P, et al. Metabolomic Profiling of Statin Use and Genetic Inhibition of HMG-CoA Reductase. *J Am Coll Cardiol* 2016; **67**(10): 1200-10.
37. Timpson NJ, Walter K, Min JL, et al. A rare variant in APOC3 is associated with plasma triglyceride and VLDL levels in Europeans. *Nat Commun* 2014; **5**: 4871.
38. Drenos F, Smith GD, Ala-Korpela M, et al. Metabolic Characterization of a Rare

Genetic Variation within APOC3 and its Lipoprotein Lipase Independent Effects.

*Circulation: Cardiovascular Genetics* 2016; CIRCGENETICS. 115.001302.

39. Fontbonne A, Diouf I, Baccara-Dinet M, Eschwege E, Charles MA. Effects of 1-year treatment with metformin on metabolic and cardiovascular risk factors in non-diabetic upper-body obese subjects with mild glucose anomalies: a post-hoc analysis of the BIGPRO1 trial. *Diabetes Metab* 2009; **35**(5): 385-91.
40. Eppinga RN, Hartman MH, van Veldhuisen DJ, et al. Effect of Metformin Treatment on Lipoprotein Subfractions in Non-Diabetic Patients with Acute Myocardial Infarction: A Glycometabolic Intervention as Adjunct to Primary Coronary Intervention in ST Elevation Myocardial Infarction (GIPS-III) Trial. *PLoS One* 2016; **11**(1): e0145719.
41. Charles MA, Morange P, Eschwege E, Andre P, Vague P, Juhan-Vague I. Effect of weight change and metformin on fibrinolysis and the von Willebrand factor in obese nondiabetic subjects: the BIGPRO1 Study. Biguanides and the Prevention of the Risk of Obesity. *Diabetes care* 1998; **21**(11): 1967-72.
42. Skretteberg PT, Grytten AN, Gjertsen K, et al. Triglycerides-diabetes association in healthy middle-aged men: modified by physical fitness? A long term follow-up of 1962 Norwegian men in the Oslo Ischemia Study. *Diabetes Res Clin Pract* 2013; **101**(2): 201-9.
43. Hjellvik V, Sakshaug S, Strom H. Body mass index, triglycerides, glucose, and blood pressure as predictors of type 2 diabetes in a middle-aged Norwegian cohort of men and women. *Clin Epidemiol* 2012; **4**: 213-24.

44. Mahamat A, Richard F, Arveiler D, et al. Body mass index, hypertension and 5-year coronary heart disease incidence in middle aged men: the PRIME study. *J Hypertens* 2003; **21**(3): 519-24.
45. Prospective Studies C, Whitlock G, Lewington S, et al. Body-mass index and cause-specific mortality in 900 000 adults: collaborative analyses of 57 prospective studies. *Lancet* 2009; **373**(9669): 1083-96.

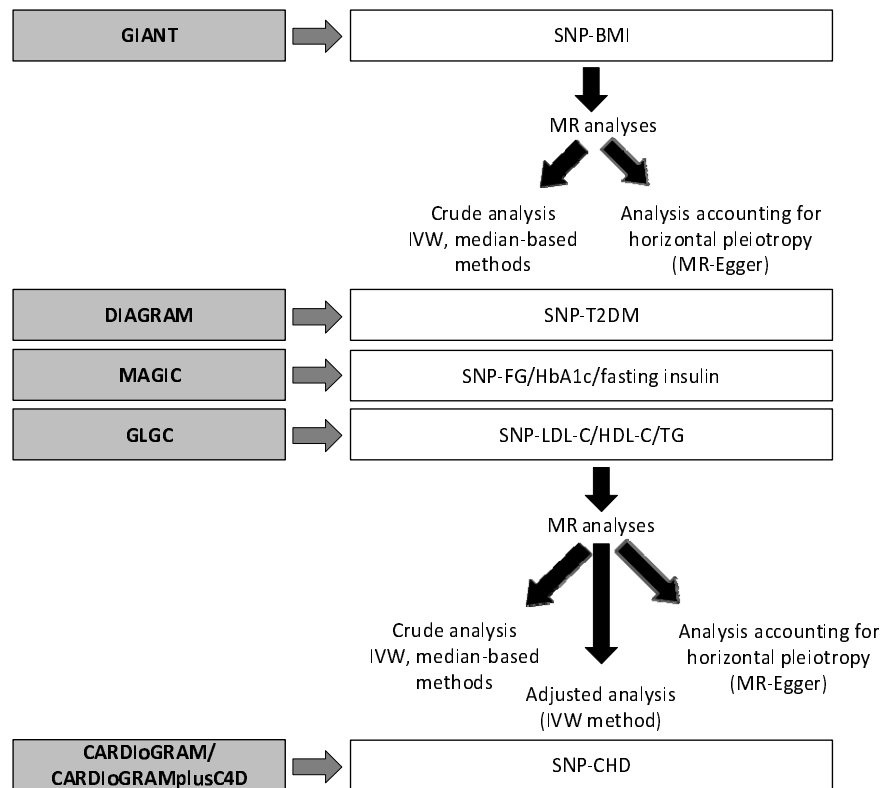

Figure 1. Analysis diagram. Summary data for SNP-phenotypes were extracted from GWAS consortia datasets (GIANT, CARDIoGRAM, C4D, DIAGRAM, MAGIC and GLGC). MR estimates of BMI on mediators (T2DM, fasting glucose, fasting insulin, HbA<sub>1c</sub>, LDL-C, HDL-C and triglycerides), and of BMI and mediators on CHD were derived using IVW method.

SNPs: single nucleotide polymorphisms; GIANT: Genetic Investigation of Anthropometric Traits; CARDIoGRAM: Coronary Artery Disease Genome-wide Replication and Meta-analysis; CARDIoGRAMplusC4D MetaboChip: CARDIoGRAMplusC4D MetaboChip meta-analysis; DIAGRAM: DIAbetes Genetics Replication And Meta-analysis; MAGIC: Meta-Analyses of Glucose and Insulin related traits Consortium; GLGC: Global Lipids Genetics Consortium; BMI: body mass index; HbA<sub>1c</sub>: glycated hemoglobin; LDL-C: low density lipoprotein

cholesterol; HDL: high density lipoprotein cholesterol; CHD: coronary heart disease;

IVW method: inverse variance weighted method; MR: Mendelian randomization.

Table 1. Mendelian randomization estimates<sup>†</sup> of risk factors with each other and with coronary heart disease and type 2 diabetes

| Exposures             | BMI, SD         | T2DM             | FPG, mmol/l    | HbA <sub>1c</sub> , % | FI, log-pmol/l  | LDL-C, SD       | HDL-C, SD       | TG, SD          | CHD           |
|-----------------------|-----------------|------------------|----------------|-----------------------|-----------------|-----------------|-----------------|-----------------|---------------|
| <b>Outcomes</b>       |                 |                  |                |                       |                 |                 |                 |                 |               |
| BMI, SD               | 0               | -0.07 (0.009)*** | 0.007 (0.04)   | 0.04 (0.05)           | -0.51 (0.14)*** | -0.04 (0.01)*   | 0.0008 (0.01)   | -0.004 (0.02)   | -0.015 (0.01) |
| T2DM                  | 0.67 (0.19)***  | 0                | 1.23 (0.14)*** | 0.36 (0.2)            | 0.53 (0.45)     | -0.09 (0.06)    | -0.03 (0.05)    | 0.05 (0.08)     | 0.10 (0.05)*  |
| FPG, mmol/l           | 0.07 (0.02)***  | 0.08 (0.007)***  | 0              | 0.07 (0.07)           | 0.05 (0.07)     | -0.04 (0.01)**  | -0.002 (0.01)   | -0.01 (0.02)    | 0.01 (0.01)   |
| HbA <sub>1c</sub> , % | 0.05 (0.03)***  | 0.03 (0.01)**    | 0.45 (0.04)*** | 0                     | -0.09 (0.1)     | -0.01 (0.02)    | -0.02 (0.02)    | -0.03 (0.02)    | 0.01 (0.02)   |
| FI, log-pmol/l        | 0.18 (0.03)***  | 0.06 (0.009)***  | 0.05 (0.05)    | -0.06 (0.06)          | 0               | -0.03 (0.02)    | 0.007 (0.02)    | 0.02 (0.02)     | -0.008 (0.01) |
| LDL-C, SD             | -0.05 (0.07)    | 0.02 (0.01)      | 0.02 (0.04)    | 0.09 (0.05)           | 0.27 (0.14)*    | 0               | -0.21 (0.02)*** | 0.19 (0.03)***  | -0.03 (0.02)  |
| HDL-C, SD             | -0.23 (0.04)*** | -0.003 (0.01)    | 0.04 (0.04)    | 0.11 (0.05)*          | 0.52 (0.16)***  | -0.18 (0.02)*** | 0               | -0.47 (0.03)*** | -0.02 (0.02)  |
| TG, SD                | 0.20 (0.03)***  | 0.02 (0.01)      | 0.03 (0.03)    | -0.02 (0.05)          | -0.21 (0.16)    | 0.07 (0.03)*    | -0.16 (0.01)*** | 0               | 0.001 (0.02)  |
| CHD                   | 0.37 (0.07)***  | 0.10 (0.03)***   | 0.19 (0.09)*   | 0.31 (0.12)*          | -0.49 (0.31)    | 0.49 (0.05)***  | -0.13 (0.04)**  | 0.21 (0.05)***  | 0             |

BMI: body mass index; FPG: fasting plasma glucose; LDL-C: low-density lipoprotein cholesterol; HDL-C: high-density lipoprotein cholesterol; TG: triglycerides; FI: fasting insulin; CHD: coronary heart disease; HbA<sub>1c</sub>: glycosylated haemoglobin A<sub>1c</sub>; T2DM: type 2 diabetes mellitus

<sup>†</sup>: All results are beta coefficients (standard error) from the MR instrumental variable estimates using inverse variance weighted and so reflect differences in mean outcome per 1 unit difference of the exposures for continuously measured outcomes and difference in log odds for binary outcomes (CHD/T2DM)

\* : P<0.05; \*\* : P<0.01; \*\*\* : P<0.001

Table 2 Mendelian randomization estimates of body mass index (SD, 1 SD=4.5 kg/m<sup>2</sup>) on  
cardiovascular risk factors and coronary heart disease

| <b>Exposure: BMI (N=322,154)</b>                                           | <b>Odds<br/>ratio</b> | <b>95% CI</b> | <b>p-value</b> |
|----------------------------------------------------------------------------|-----------------------|---------------|----------------|
| <b>Coronary heart disease (N=60,801 cases and<br/>123,504 controls)</b>    |                       |               |                |
| Inverse-variance weighted                                                  | 1.45                  | 1.27 to 1.66  | <0.001         |
| Simple median                                                              | 1.40                  | 1.23 to 1.59  | <0.001         |
| Weighted median                                                            | 1.44                  | 1.24 to 1.67  | <0.001         |
| Penalized weighted median                                                  | 1.44                  | 1.24 to 1.67  | <0.001         |
| MR-Egger regression                                                        |                       |               |                |
| slope                                                                      | 1.55                  | 1.26 to 1.91  | <0.001         |
| Intercept (directional pleiotropy)                                         | 1.00                  | 0.99 to 1.00  | 0.50           |
| <b>Type 2 diabetes mellitus (N= 34,840 cases and<br/>114,981 controls)</b> |                       |               |                |
| Inverse-variance weighted                                                  | 1.96                  | 1.35 to 2.83  | <0.001         |
| Simple median                                                              | 2.30                  | 1.93 to 2.74  | <0.001         |
| Weighted median                                                            | 2.63                  | 2.16 to 3.21  | <0.001         |
| Penalized weighted median                                                  | 2.37                  | 1.95 to 2.88  | <0.001         |
| MR-Egger regression                                                        |                       |               |                |
| slope                                                                      | 3.42                  | 2.63 to 4.46  | <0.001         |
| Intercept (directional pleiotropy)                                         | 0.98                  | 0.98 to 0.99  | <0.001         |

|                                               | <b>Beta</b> | <b>95% confidence interval</b> | <b>p-value</b> |
|-----------------------------------------------|-------------|--------------------------------|----------------|
| <b>Fasting glucose, mmol/l (N=46,186)</b>     |             |                                |                |
| Inverse-variance weighted                     | 0.07        | 0.03 to 0.11                   | <0.001         |
| Simple median                                 | 0.06        | 0.03 to 0.09                   | <0.001         |
| Weighted median                               | 0.08        | 0.05 to 0.12                   | <0.001         |
| Penalized weighted median                     | 0.07        | 0.04 to 0.11                   | <0.001         |
| MR-Egger regression                           |             |                                |                |
| slope                                         | 0.09        | 0.036 to 0.15                  | <0.001         |
| intercept                                     | -0.0007     | -0.002 to 0.001                | 0.37           |
| <b>HbA<sub>1c</sub>, % (N=46,368)</b>         |             |                                |                |
| Inverse-variance weighted                     | 0.05        | 0.01 to 0.08                   | 0.005          |
| Simple median                                 | 0.07        | 0.02 to 0.11                   | 0.004          |
| Weighted median                               | 0.09        | 0.04 to 0.14                   | <0.001         |
| Penalized weighted median                     | 0.09        | 0.04 to 0.14                   | <0.001         |
| MR-Egger regression                           |             |                                |                |
| slope                                         | 0.09        | 0.008 to 0.16                  | 0.03           |
| intercept                                     | -0.001      | -0.003 to 0.001                | 0.31           |
| <b>Fasting insulin, log pmol/l (N=46,186)</b> |             |                                |                |
| Inverse-variance weighted                     | 0.18        | 0.14 to 0.22                   | <0.001         |
| Simple median                                 | 0.18        | 0.13 to 0.23                   | <0.001         |
| Weighted median                               | 0.18        | 0.12 to 0.24                   | <0.001         |



|                                                 |         |                 |        |
|-------------------------------------------------|---------|-----------------|--------|
| Penalized weighted median                       | 0.18    | 0.12 to 0.24    | <0.001 |
| MR-Egger regression                             |         |                 |        |
| slope                                           | 0.16    | 0.07 to 0.25    | <0.001 |
| intercept                                       | 0.0007  | -0.002 to 0.003 | 0.60   |
| <b>LDL-C, SD (1 SD= 38.7 mg/dL) (N=188,577)</b> |         |                 |        |
| Inverse-variance weighted                       | -0.05   | -0.19 to 0.09   | 0.50   |
| Simple median                                   | 0.01    | -0.04 to 0.06   | 0.69   |
| Weighted median                                 | -0.01   | -0.08 to 0.05   | 0.66   |
| Penalized weighted median                       | -0.02   | -0.09 to 0.04   | 0.50   |
| MR-Egger regression                             |         |                 |        |
| slope                                           | -0.10   | -0.184 to -0.02 | 0.02   |
| intercept                                       | 0.0016  | -0.001 to 0.004 | 0.19   |
| <b>HDL-C, SD (1 SD= 15.5 mg/dL) (N=188,577)</b> |         |                 |        |
| Inverse-variance weighted                       | -0.23   | -0.32 to -0.15  | <0.001 |
| Simple median                                   | -0.21   | -0.26 to -0.16  | <0.001 |
| Weighted median                                 | -0.21   | -0.27 to -0.16  | <0.001 |
| Penalized weighted median                       | -0.21   | -0.27 to -0.15  | <0.001 |
| MR-Egger regression                             |         |                 |        |
| slope                                           | -0.23   | -0.307 to -0.15 | <0.001 |
| intercept                                       | -0.0001 | -0.002 to 0.002 | 0.90   |
| <b>TG, SD (1 SD= 90.7 mg/dL) (N=188,577)</b>    |         |                 |        |
| Inverse-variance weighted                       | 0.20    | 0.14 to 0.26    | <0.001 |

|                           |       |                 |        |
|---------------------------|-------|-----------------|--------|
| Simple median             | 0.21  | 0.16 to 0.26    | <0.001 |
| Weighted median           | 0.21  | 0.15 to 0.27    | <0.001 |
| Penalized weighted median | 0.21  | 0.16 to 0.27    | <0.001 |
| MR-Egger regression       |       |                 |        |
| slope                     | 0.17  | 0.09 to 0.24    | <0.001 |
| intercept                 | 0.001 | -0.001 to 0.003 | 0.37   |

SD: standard deviation; CI: confidence interval; BMI: body mass index; LDL-C: low-density

lipoprotein cholesterol; HDL-C: high-density lipoprotein cholesterol; TG: triglycerides; HbA<sub>1c</sub>:

glycosylated haemoglobin A<sub>1c</sub>

Table 3 Mendelian randomization estimates of cardiovascular risk factors on coronary heart disease

| <b>Risk Factors</b>             | <b>Odds ratio</b> | <b>95% CI</b> | <b>p-value</b> |
|---------------------------------|-------------------|---------------|----------------|
| <b>Type 2 diabetes mellitus</b> |                   |               |                |
| Inverse-variance weighted       | 1.12              | 1.06 to 1.18  | <0.001         |
| Simple median                   | 1.12              | 1.06 to 1.18  | <0.001         |
| Weighted median                 | 1.11              | 1.05 to 1.17  | <0.001         |
| Penalized weighted median       | 1.11              | 1.05 to 1.17  | <0.001         |
| MR-Egger regression             |                   |               |                |
| slope                           | 1.07              | 0.99 to 1.15  | 0.10           |
| intercept                       | 1.01              | 1.00 to 1.01  | 0.17           |
| <b>Fasting glucose, mmol/l</b>  |                   |               |                |
| Inverse-variance weighted       | 1.31              | 1.09 to 1.58  | <0.001         |
| Simple median                   | 1.21              | 0.99 to 1.48  | 0.07           |
| Weighted median                 | 1.21              | 1.01 to 1.44  | 0.03           |
| Penalized weighted median       | 1.20              | 1.01 to 1.44  | 0.04           |
| MR-Egger regression             |                   |               |                |
| slope                           | 1.08              | 0.87 to 1.35  | 0.50           |
| intercept                       | 1.01              | 1.00 to 1.01  | 0.04           |
| <b>HbA<sub>1c</sub>, %</b>      |                   |               |                |
| Inverse-variance weighted       | 1.30              | 1.08 to 1.56  | 0.01           |
| Simple median                   | 1.31              | 1.03 to 1.68  | 0.03           |

|                                     |      |              |        |
|-------------------------------------|------|--------------|--------|
| Weighted median                     | 1.36 | 1.07 to 1.74 | 0.01   |
| Penalized weighted median           | 1.36 | 1.07 to 1.74 | 0.01   |
| MR-Egger regression                 |      |              |        |
| slope                               | 1.66 | 1.03 to 2.68 | 0.04   |
| intercept                           | 0.99 | 0.97 to 1.01 | 0.27   |
| <b>Fasting insulin, log pmol/l</b>  |      |              |        |
| Inverse-variance weighted           | 2.80 | 1.89 to 4.16 | <0.001 |
| Simple median                       | 2.51 | 1.60 to 3.94 | <0.001 |
| Weighted median                     | 2.61 | 1.61 to 4.23 | <0.001 |
| Penalized weighted median           | 2.65 | 1.65 to 4.26 | <0.001 |
| MR-Egger regression                 |      |              |        |
| slope                               | 0.49 | 0.09 to 2.59 | 0.40   |
| Intercept                           | 1.03 | 1.00 to 1.05 | 0.04   |
| <b>LDL-C, SD (1 SD= 38.7 mg/dL)</b> |      |              |        |
| Inverse-variance weighted           | 1.58 | 1.43 to 1.75 | <0.001 |
| Simple median                       | 1.60 | 1.41 to 1.81 | <0.001 |
| Weighted median                     | 1.63 | 1.48 to 1.80 | <0.001 |
| Penalized weighted median           | 1.58 | 1.44 to 1.75 | <0.001 |
| MR-Egger regression                 |      |              |        |
| slope                               | 1.74 | 1.59 to 1.90 | <0.001 |
| intercept                           | 0.99 | 0.98 to 0.99 | 0.01   |
| <b>HDL-C, SD (1 SD= 15.5 mg/dL)</b> |      |              |        |

|                                  |      |               |        |
|----------------------------------|------|---------------|--------|
| Inverse-variance weighted        | 0.86 | 0.78 to 0.95  | <0.001 |
| Simple median                    | 0.78 | 0.67 to 0.90  | <0.001 |
| Weighted median                  | 0.88 | 0.81 to 0.95  | <0.001 |
| Penalized weighted median        | 0.87 | 0.80 to 0.94  | <0.001 |
| MR-Egger regression              |      |               |        |
| slope                            | 1.03 | 0.95 to 1.12  | 0.46   |
| intercept                        | 0.99 | 0.98 to 0.99  | <0.001 |
| <b>TG, SD (1 SD= 90.7 mg/dL)</b> |      |               |        |
| Inverse-variance weighted        | 1.24 | 1.10 to 1.41  | <0.001 |
| Simple median                    | 1.21 | 1.03 to 1.43  | 0.02   |
| Weighted median                  | 1.23 | 1.11 to 1.36  | <0.001 |
| Penalized weighted median        | 1.24 | 1.12 to 1.37  | <0.001 |
| MR-Egger regression              |      |               |        |
| slope                            | 1.13 | 1.03 to 1.24  | 0.01   |
| intercept                        | 1.01 | 1.003 to 1.01 | <0.001 |

SD: standard deviation; CI: confidence interval; LDL-C: low-density lipoprotein cholesterol;

HDL-C: high-density lipoprotein cholesterol; TG: triglycerides; HbA<sub>1c</sub>: glycosylated

haemoglobin A<sub>1c</sub>

Table 4 Multivariate separate-sample Mendelian randomization analysis of the effect of body mass index (per SD, 1 SD=4.5 kg/m<sup>2</sup>) on coronary heart disease

|                                       | <b>Odds ratio</b> | <b>95% CI</b> | <b>p-value</b> | <b>Mediation effect</b> |
|---------------------------------------|-------------------|---------------|----------------|-------------------------|
| MR-IVW regression, crude              | 1.45              | 1.27 to 1.66  | <0.001         |                         |
| Multivariate model                    |                   |               |                |                         |
| (1) adjusted for TG                   | 1.16              | 0.99 to 1.36  | 0.06           | 22%                     |
| (2) adjusted for HbA <sub>1c</sub>    | 1.36              | 1.19 to 1.57  | 0.001          | 4%                      |
| (3) adjusted for T2DM                 | 1.35              | 1.17 to 1.56  | 0.001          | -                       |
| (4) adjusted for TG+HbA <sub>1c</sub> | 1.09              | 0.94 to 1.27  | 0.25           | 38%                     |
| (5) adjusted for TG+ T2DM             | 1.10              | 0.94 to 1.29  | 0.22           | -                       |

SD: standard deviation; CI: confidence interval; TG: triglycerides; HbA<sub>1c</sub>: glycosylated

haemoglobin A<sub>1c</sub>; T2DM: type 2 diabetes mellitus

# Box 1: Summary of Mendelian randomisation and its assumptions

Figure Box 1 below shows the assumptions underlying Mendelian randomization

## 1. Figure Box 1: Mendelian randomization

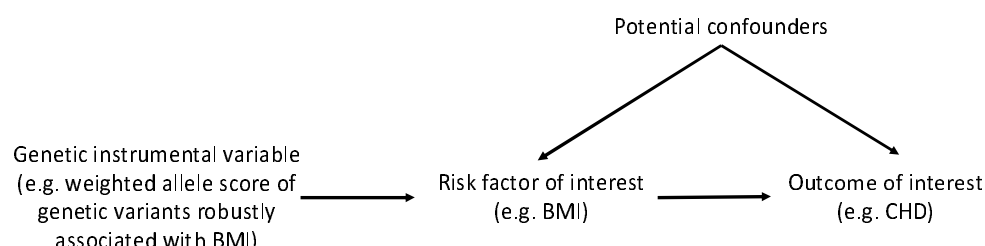

These are that:

- The genetic instrumental variable(s) are robustly related to the risk factor of interest (here BMI); this is illustrated in the Figure above by the arrow from the genetic instruments to BMI
- There is no relationship between any confounders of the risk factor (BMI) and outcome (CHD) and the genetic instrumental variable; illustrated by the lack of any arrow between these confounders and the genetic instrument
- There is no path from the genetic instrument to the outcome, other than through its relationship to the risk factor; illustrated by the lack of any arrow that goes directly from the genetic instrument to the outcome.

Empirical evidence suggests that the most likely of these three assumptions to be violated, and result in potentially biased results, is the last one. This may be violated in MR studies by horizontal pleiotropy – that is where the genetic instrument(s) affect other factors which independently of their impact on the risk factor of interest, influence the outcome. If this horizontal pleiotropy is present then the MR estimate

of the effect of a risk factor on outcome will be biased, it will actually be the combined effect of that risk factor and any other (pleiotropic) paths from the genetic instruments to outcome. The bias could be an exaggeration of the true effect (if the horizontal pleiotropic paths are in the same direction as that of the main risk factor of interest) or a diminution of the true effect (if the horizontal pleiotropic effect is in the opposite direction of the risk factor of interest).

## 2. *Estimating causal effects in MR*

There are a number of different statistical methods that can be used to estimate causal MR effects. Many of these are related to the ratio, which is intuitive. If the assumptions above are correct then the causal effect of the risk factor (BMI) on outcome (CHD) is the ratio of ‘the association of genetic instruments with CHD’ to ‘the association of genetic instrument with BMI’.

## 3. *Two sample MR*

Valid MR estimates can be obtained using two (independent) samples for the association of the genetic instrument with outcome and the association of genetic instrument with risk factor.<sup>15</sup> There are some advantages of this 2-sample MR approach over the 1-sample approach (where both parts of the ratio are obtained from the same sample), including the potential to gain very large sample sizes by using publicly available aggregate genome-wide data as we have done here and apply novel methods for testing horizontal pleiotropy that have been developed for use in 2-sample MR with aggregate GWAS data (see methods section of paper and supplementary material for detailed descriptions of these).
